# Supplementary material for: Inhibition of casein kinase 1δ/εimproves cognitive-affective behavior and reduces amyloid load in the APP-PS1 mouse model of Alzheimer’s disease
Source: PubMed Central journal article supplement (PMC6760153; doi:10.1038/s41598-019-50197-x), 2019-09-24
Supplement: 41598_2019_50197_MOESM1_ESM.pdf [file 41598_2019_50197_MOESM1_ESM.pdf]

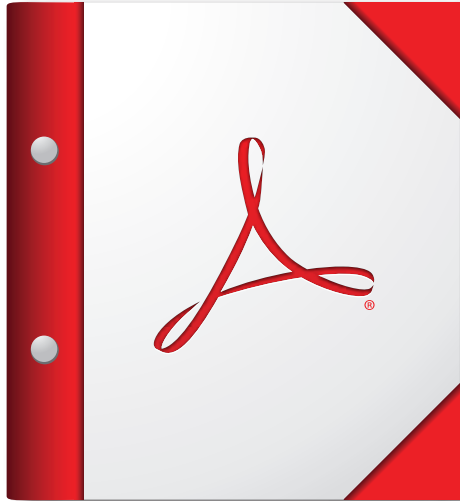

**For the best experience, open this PDF portfolio in  
Acrobat X or Adobe Reader X, or later.**

[Get Adobe Reader Now!](#)
